# Supplementary material
Source: Research Square preprint supplement (doi:10.21203/rs.3.rs-8846113/v1)

**Bioactivity of Recombinantly Expressed Human Serglycin Under Different Glycemic Conditions**

Shang-Wun Jhang1, Ya-Ning Chang2, Chiu-Chen Huang4, Yu-Ting Yan5, Bill Cheng2*

**Affiliation**

1Department of Neurosurgery, Changhua Christian Hospital, Changhua, Taiwan

2Graduate Institute of Biomedical Engineering, National Chung-Hsing University, Taichung, Taiwan

3Food and Drug Administration, Ministry of Health and Welfare, Taipei, Taiwan

4Department of Post-Baccalaureate Veterinary Medicine, Asia University, Taichung, Taiwan

5Institute of Biomedical Science, Academia Sinica, Taipei, Taiwan

**Correspondence**

Bill Cheng, Ph.D.

Graduate Institute of Biomedical Engineering

National Chung-Hsing University

No.145, Xing Da Road, Taichung, 402, Taiwan

Phone: +886-4-22840165 #936

Email: bcheng@dragon.nchu.edu.tw

**Supplementary Figures**


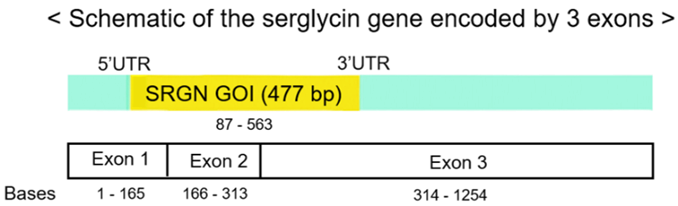


**Supplementary Figure 1**. **Schematic diagram depicting the mRNA of human serglycin.** Primers were designed to amplify the gene of interest (GOI, yellow) that was cloned into the pcDNA4/myc-HisA vector. The GOI encompassed the signal peptide sequence of serglycin.


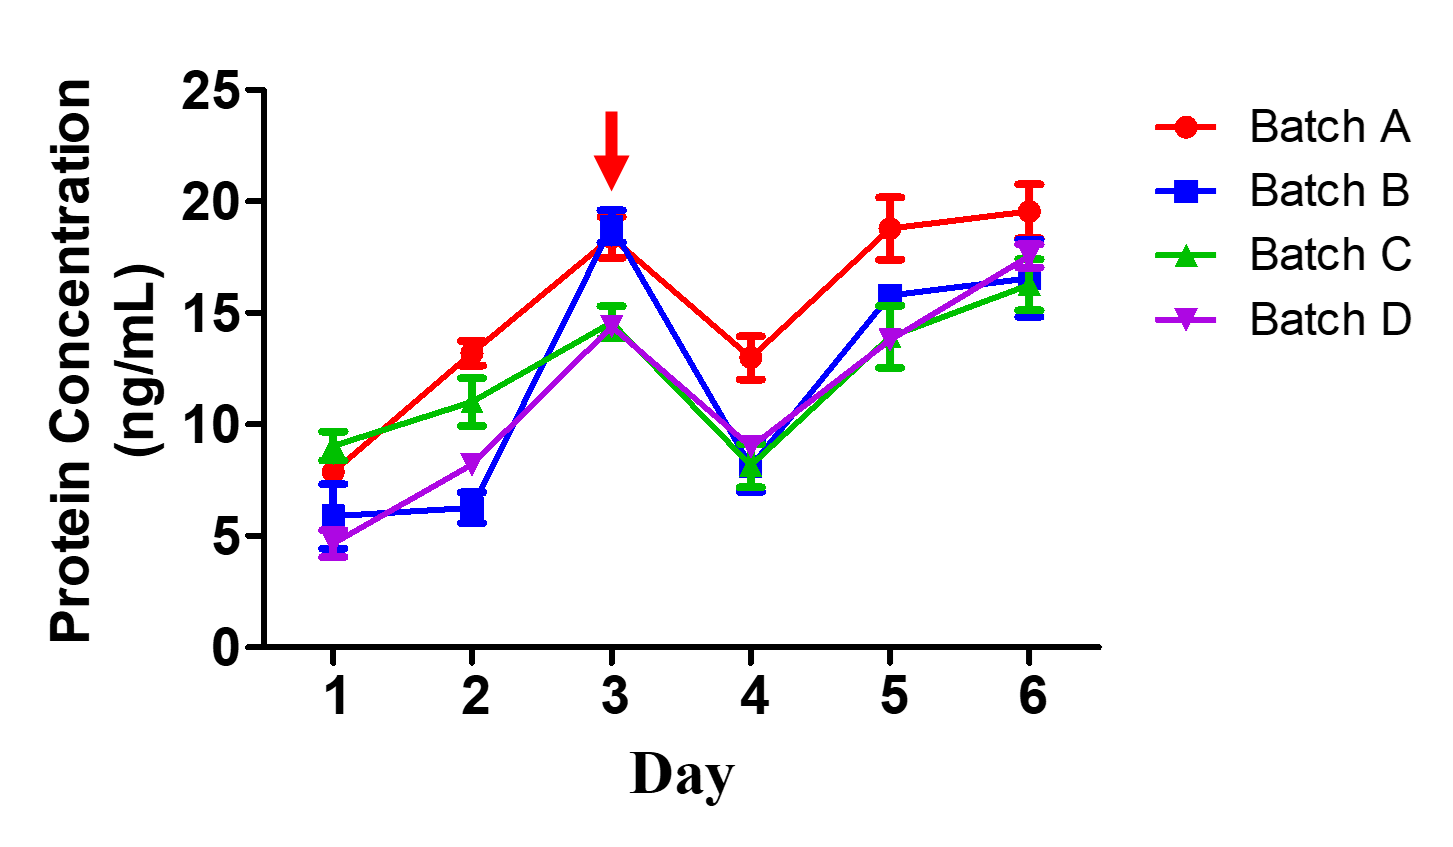


**Supplementary Figure 2 The productivity of rhSRGN in each of the four batches over 6 days of culturing.** Cells were transfected with pcDNA4/SRGN-HisA on Day 0. After 24 hours of incubation (Day 1), the cells were exposed to 400 μg/mL of zeocin for the rest of the culturing period. At Day 3, cells were passaged at 1×105 cells/mL (red arrow). Aliquots were taken from the collected media of each batch on each day, and the concentration of rhSRGN was quantified with human serglycin sandwich ELISA (N=3)


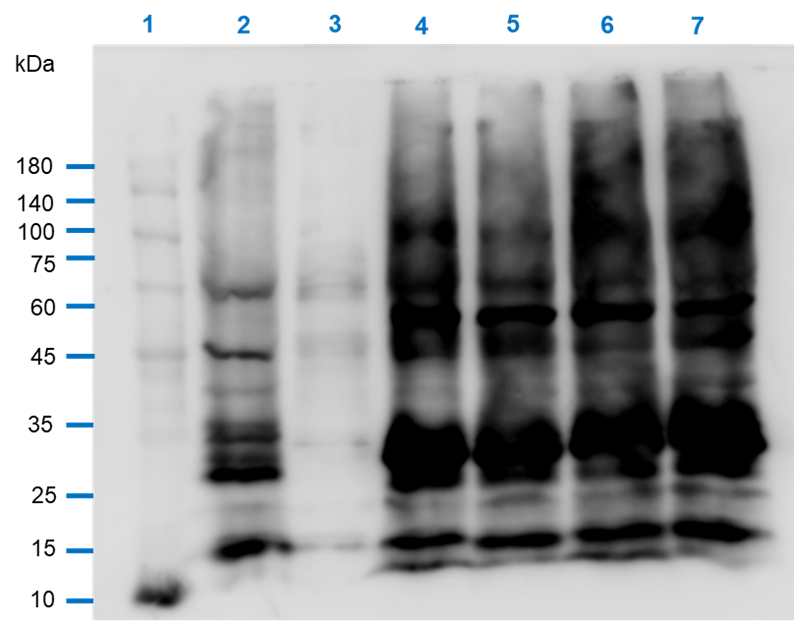


**Supplementary Figure 3.** **Western blotting analysis of the rhSRGN in all four batches.** Each lane was loaded with 10 μg/mL of protein samples. Before being loaded into the gel, the protein samples were mixed with a loading dye that contained 0.1M DTT and placed in a 60 °C dry bath for 10 minutes. Lane 1, molecular weight marker; Lane 2, THP-1 cell lysate; Lane 3, HEK293T cell lysate; Lane 4, Batch A rhSRGN; Lane 5, Batch B rhSRGN; Lane 6, Batch C rhSRGN; Lane 7, Batch D SRGN.


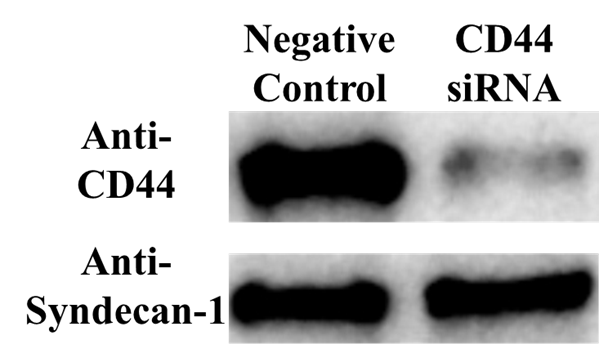


**Supplementary Figure 4. Western blotting analysis of the expression of CD44 and syndecan-1 in HaCaT treated with CD44 siRNA.** HaCaT cultured in a 2-well insert were transfected with either negative control or CD44 siRNA and were incubated for one overnight. After the cells underwent migration in NG media, the cells were sacrificed, and the expressions of CD44 and synedcan-1 were studied.

The gel and the Western blot presented in Figure 2 is the uncropped form.


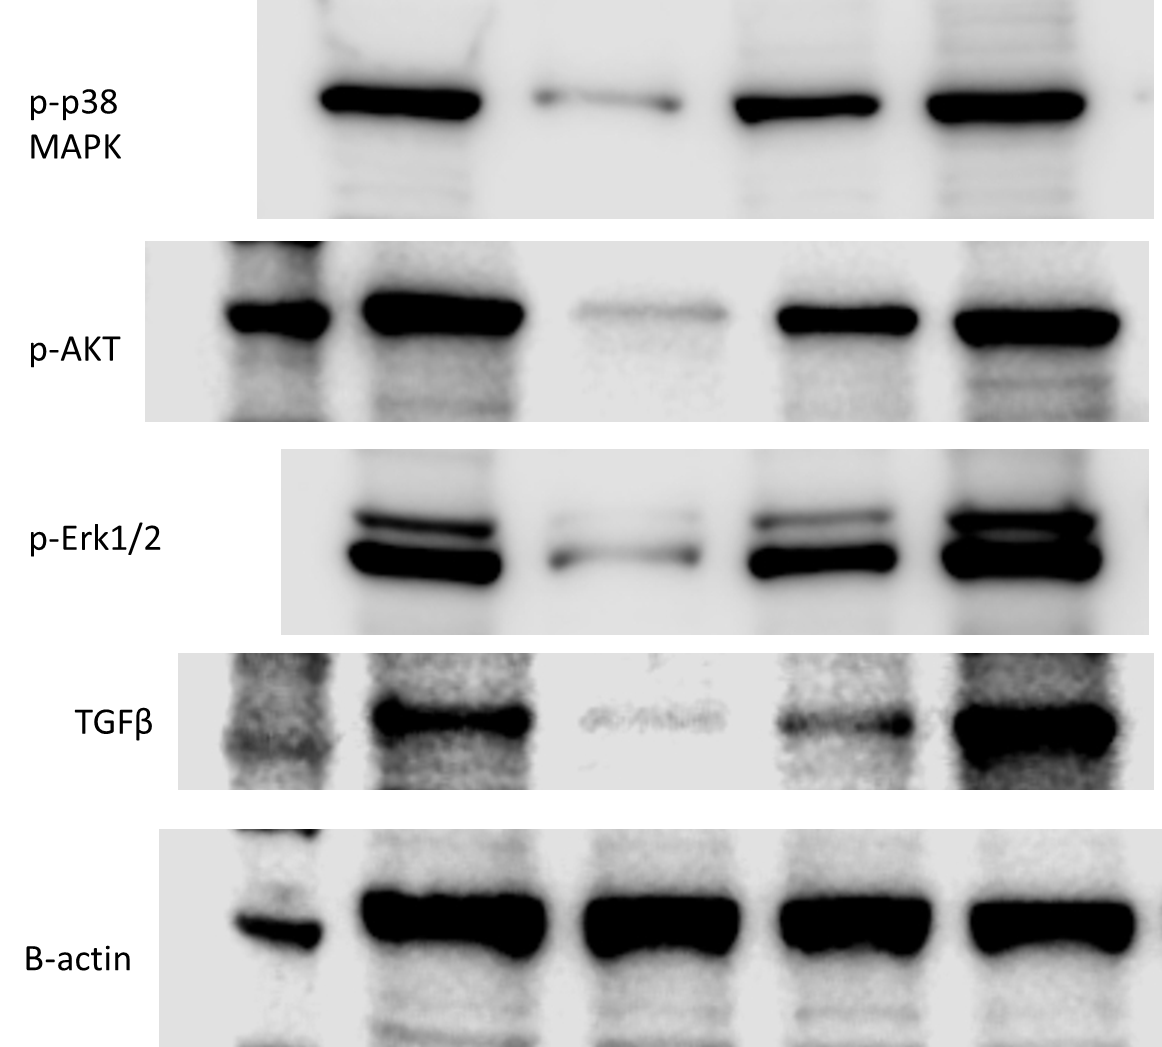


The figure above is the uncropped blot of the Western blot presented in Figure 5.


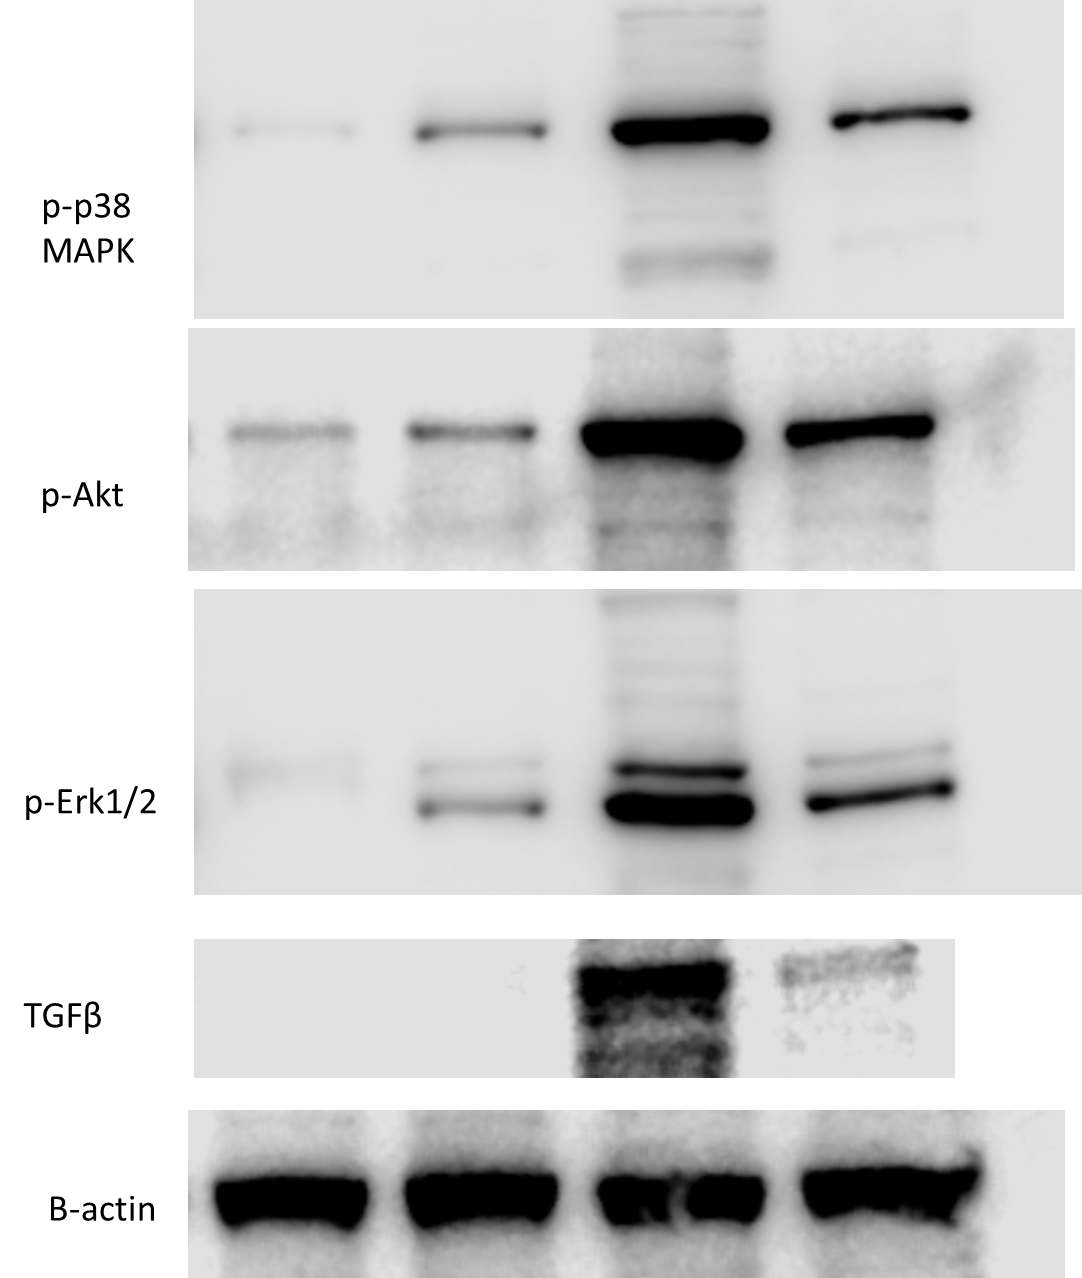


The figure above is the uncropped blot of the Western blot presented in Figure 7.


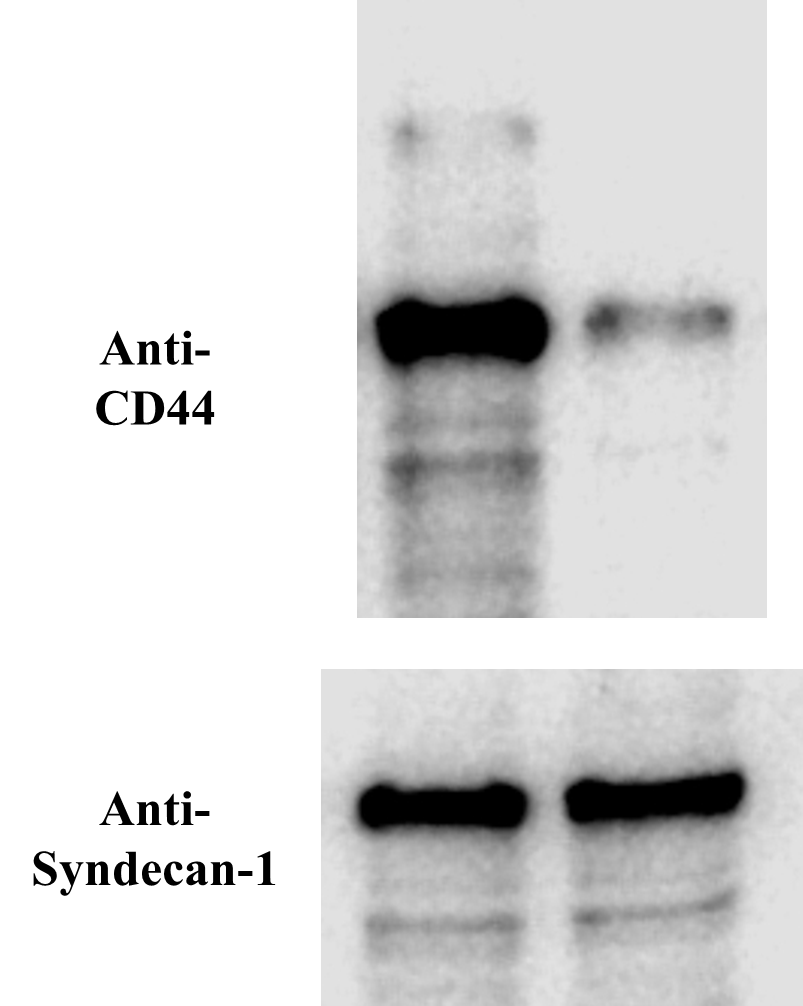


The figure above is the uncropped blot of the Western blot presented in Supplementary Figure 4.

**Supplementary Table**

**Supplemental Table 1.** **The amount of rhSRGN purified from the conditioned media of each batch.** The amount of serglycin purified from 250 mL of conditioned media. The proteins were quantified with a commercially available serglycin sandwich ELISA kit. The cell lysate of human monocytes (THP-1) was used as the positive control.

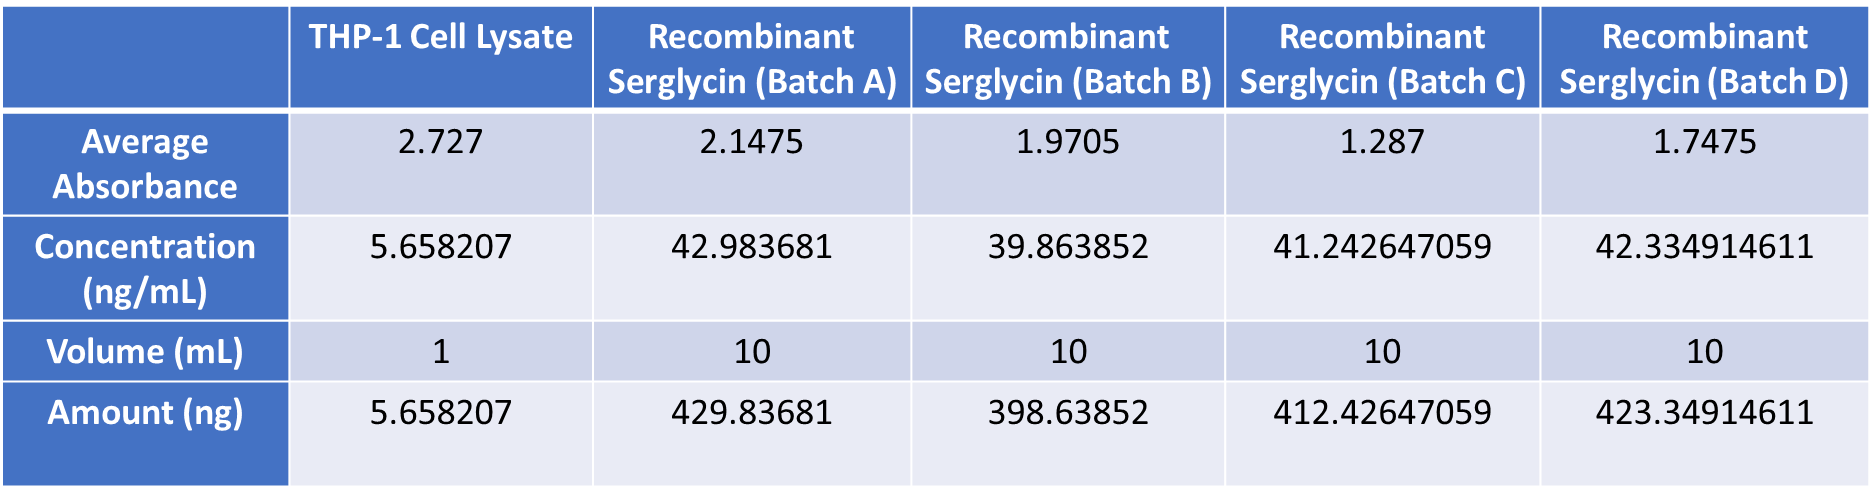

Supplement: Supplementary file 1 [file 058eaeedd9eab4c587ec72ed.docx]
